# Supplementary material for: Unaccounted CO2 leaks downstream of a large tropical hydroelectric reservoir
Source: PubMed Central journal article supplement — Proc Natl Acad Sci U S A. 2021 Jun 14;118(25):e2026004118. doi: 10.1073/pnas.2026004118 (PMC8237613; doi:10.1073/pnas.2026004118), 2021-06-14
Supplement: pnas.2026004118.sapp.pdf [file pnas.2026004118.sapp.pdf]

## **Supplementary Information for** Unaccounted CO<sub>2</sub> leaks downstream of a large tropical hydroelectric reservoir

Elisa Calamita <sup>a, b, 1</sup>, Annunziato Siviglia <sup>c</sup>, Gretchen M. Gettel <sup>d</sup>, Mário J. Franca <sup>d, e</sup>,  
R. Scott Winton <sup>a, b</sup>, Cristian R. Teodoru <sup>a</sup>, Martin Schmid <sup>b</sup>, and Bernhard Wehrli <sup>a, b</sup>

<sup>a</sup> Institute of Biogeochemistry and Pollutant Dynamics, ETH Zurich, Zürich, Switzerland

<sup>b</sup> Eawag, Swiss Federal Institute of Aquatic Science and Technology, Kastanienbaum, Switzerland

<sup>c</sup> Department of Civil, Environmental and Mechanical Engineering, University of Trento, Italy

<sup>d</sup> IHE-Delft Institute for Water Education, Delft, The Netherlands

<sup>e</sup> Department of Hydraulic Engineering, Delft University of Technology, Delft, The Netherlands

<sup>1</sup> Corresponding author: Elisa Calamita

Email: [elisa.calamita@usys.ethz.ch](mailto:elisa.calamita@usys.ethz.ch)

### **This PDF file includes:**

Figure S1

Figure S2

Figure S3

Figure S4

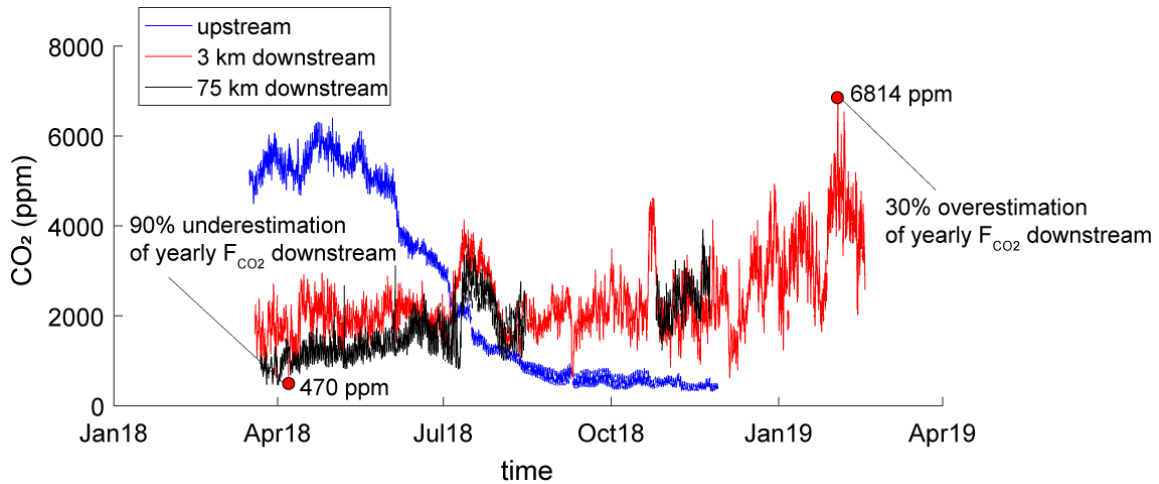

Figure S1. Calculated CO<sub>2</sub> concentration for the Zambezi River at Victoria Falls (upstream, blue curve), Siavonga (3 km downstream of Kariba Dam, red curve) and Chirundu (~75 km downstream of Kariba Dam, black curve). This third sensor was deployed to check that the pCO<sub>2</sub> after 75 km has not dropped significantly, meaning that the river is emitting all along this stretch. This justifies considering the entire river stretch as dam-impacted.

The red dots indicate the minimum and maximum CO<sub>2</sub> fluxes occurring at Siavonga in April 2018 and February 2019, respectively. These two values have been used to calculate the maximum under- and over-estimation potentially occurring in the yearly F<sub>CO2</sub> downstream flux if calculated based only on one survey.

Gaps in the time series are due to periods of failure of the sensors. The total CO<sub>2</sub> entering the reservoir was calculated integrating over a year the saturation concentration at the water temperature measured at the Victoria Falls. Given some gaps in the Victoria Falls data series (sensor working for less than 365 days), we used the available data and then we linearly scaled the obtained integral of CO<sub>2</sub> for a 365-day year.

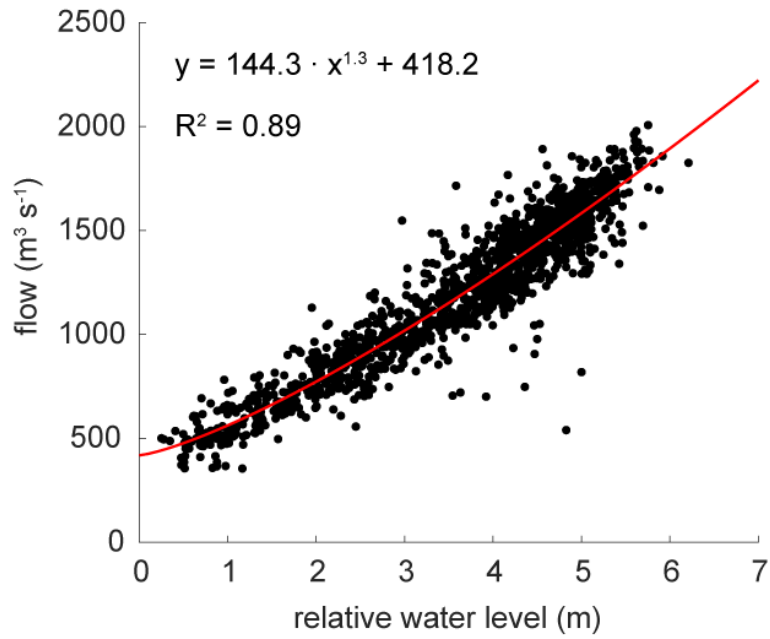

Figure S2. Relative rating curve for the Zambezi River 3 km downstream of Kariba Dam. The relative water level refers to the water level above the measuring sensor and the hourly flow data are provided by the two hydropower companies managing the Kariba Dam: Zambia Electricity Supply Corporation (ZESCO) and Zimbabwe Power Corporation (ZPC).

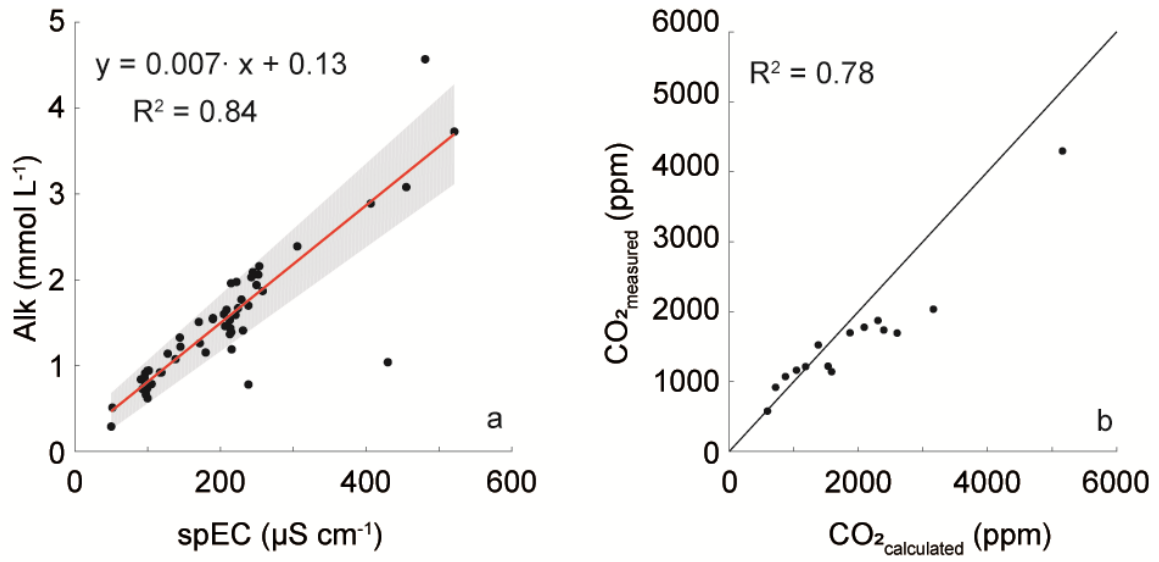

Figure S3. (a) Linear fit (red line) between specific conductivity and alkalinity used to reconstruct alkalinity at the hourly time resolution.  $R^2$  indicates the coefficient of determination for the proposed linear fitting. (b) Comparison between calculated and measured  $\text{CO}_2$  concentrations. The black line indicates the 1:1 line and  $R^2$  indicates the coefficient of determination between the calculated and measured  $\text{CO}_2$  values.

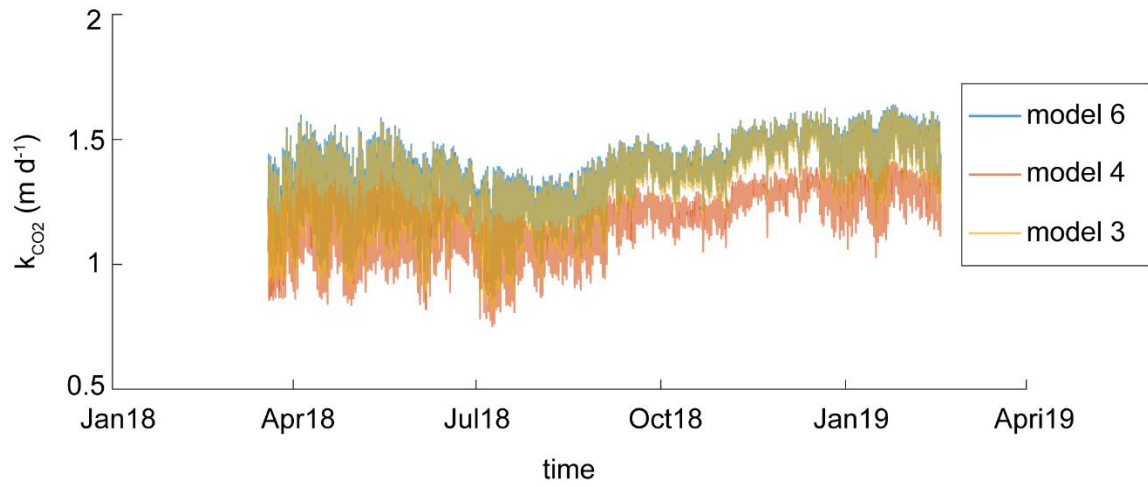

Figure S4. Hourly time series of the CO<sub>2</sub> gas transfer velocity at the water-air interface calculated using three of the different predictive models proposed by Raymond et al. (1).

#### SI References

1. P. A. Raymond, *et al.*, Scaling the gas transfer velocity and hydraulic geometry in streams and small rivers. *Limnol. Oceanogr. Fluids Environ.* **2**, 41–53 (2012).
